# Supplementary material
Source: Research Square preprint supplement (doi:10.21203/rs.3.rs-9808595/v1)
Supplement: Supplementary file 1 [file 290ca2755cab2266ce658e59.docx]

**Supplementary Information**

Tables

Table S1. The P300 Peak Amplitude on PO3 & PO4 electrodes across all participants

| group | emotion | side | Mean | Std. Error | Std. Deviation | 95% Confidence Interval | |
| --- | --- | --- | --- | --- | --- | --- | --- |
| Lower Bound | Upper Bound |
| typical | positive | left | 7.842 | 1.506 | 4.645763 | 4.793 | 10.891 |
| right | 10.067 | 1.583 | 6.784733 | 6.862 | 13.272 |
| neutral | left | 7.845 | 1.164 | 3.858298 | 5.488 | 10.202 |
| right | 8.202 | 1.296 | 5.190324 | 5.579 | 10.826 |
| negative | left | 8.616 | 1.522 | 4.993187 | 5.534 | 11.698 |
| right | 10.428 | 1.597 | 7.154520 | 7.195 | 13.660 |
| autism | positive | left | 12.713 | 1.506 | 8.316132 | 9.664 | 15.762 |
| right | 13.596 | 1.583 | 7.362438 | 10.391 | 16.801 |
| neutral | left | 12.146 | 1.164 | 6.272812 | 9.789 | 14.503 |
| right | 12.356 | 1.296 | 6.343250 | 9.732 | 14.979 |
| negative | left | 13.778 | 1.522 | 8.233077 | 10.696 | 16.860 |
| right | 14.347 | 1.597 | 7.128586 | 11.114 | 17.580 |

Table S2. The P300 Peak Amplitude on PO7 & PO8 electrodes across all participants

| group | emotion | side | Mean | Std. Error | Std. Deviation | 95% Confidence Interval | |
| --- | --- | --- | --- | --- | --- | --- | --- |
| Lower Bound | Upper Bound |
| typical | positive | left | 7.237 | 1.606 | 4.775126 | 3.985 | 10.488 |
| right | 9.209 | 1.468 | 6.321234 | 6.237 | 12.181 |
| neutral | left | 7.038 | 1.136 | 3.924800 | 4.739 | 9.337 |
| right | 7.946 | 1.275 | 5.489616 | 5.364 | 10.527 |
| negative | left | 8.063 | 1.534 | 5.143535 | 4.958 | 11.168 |
| right | 9.799 | 1.542 | 6.742487 | 6.677 | 12.922 |
| autism | positive | left | 11.095 | 1.606 | 8.965093 | 7.843 | 14.346 |
| right | 11.884 | 1.468 | 6.800822 | 8.912 | 14.856 |
| neutral | left | 10.239 | 1.136 | 6.015865 | 7.939 | 12.538 |
| right | 10.510 | 1.275 | 5.909171 | 7.928 | 13.091 |
| negative | left | 11.398 | 1.534 | 8.223818 | 8.293 | 14.503 |
| right | 12.843 | 1.542 | 7.050105 | 9.721 | 15.966 |

Table S3. The P300 Peak Amplitude on P7 & P8 electrodes across all participants

| group | emotion | side | Mean | Std. Error | Std. Deviation | 95% Confidence Interval | |
| --- | --- | --- | --- | --- | --- | --- | --- |
| Lower Bound | Upper Bound |
| typical | positive | left | 6.658 | 1.447 | 4.296842 | 3.728 | 9.587 |
| right | 8.719 | 1.132 | 4.832332 | 6.427 | 11.012 |
| neutral | left | 5.908 | .948 | 3.518642 | 3.990 | 7.826 |
| right | 7.765 | 1.042 | 4.032578 | 5.657 | 9.874 |
| negative | left | 6.652 | 1.297 | 4.685397 | 4.027 | 9.277 |
| right | 9.238 | 1.314 | 4.643350 | 6.578 | 11.898 |
| autism | positive | left | 9.837 | 1.447 | 8.081133 | 6.908 | 12.767 |
| right | 10.454 | 1.132 | 5.286014 | 8.161 | 12.746 |
| neutral | left | 8.824 | .948 | 4.851502 | 6.906 | 10.742 |
| right | 9.277 | 1.042 | 5.209369 | 7.168 | 11.386 |
| negative | left | 9.805 | 1.297 | 6.730054 | 7.180 | 12.430 |
| right | 11.044 | 1.314 | 6.892025 | 8.384 | 13.703 |

Table S4. Comparison of P300 Peak Latency in each emotion between P3 and P4 electrodes across all participants

|  | | Mean | N | Std. Deviation | Std. Error Mean |
| --- | --- | --- | --- | --- | --- |
| Pair1 | P300PositiveP3PeakLatency | 324.25000 | 40 | 49.232442 | 7.784333 |
| P300PositiveP4PeakLatency | 325.60000 | 40 | 35.556239 | 5.621935 |
| Pair2 | P300NeutralP3PeakLatency | 345.55000 | 40 | 57.524109 | 9.095360 |
| P300NeutralP4PeakLatency | 325.75000 | 40 | 37.343005 | 5.904447 |
| Pair3 | P300NegativeP3PeakLatency | 331.00000 | 40 | 49.803717 | 7.874659 |
| P300NegativeP4PeakLatency | 336.90000 | 40 | 54.392590 | 8.600224 |

Table S5. The P300 Peak Latency on PO7 & PO8 electrodes across all participants

| group | emotion | side | Mean | Std. Error | Std. Deviation | 95% Confidence Interval | |
| --- | --- | --- | --- | --- | --- | --- | --- |
| Lower Bound | Upper Bound |
| normal | positive | left | 372.700 | 15.242 | 72.050494 | 341.844 | 403.556 |
| right | 353.300 | 11.642 | 62.331119 | 329.732 | 376.868 |
| neutral | left | 385.900 | 13.751 | 67.874420 | 358.063 | 413.737 |
| right | 354.000 | 12.754 | 63.388526 | 328.182 | 379.818 |
| negative | left | 391.100 | 13.003 | 69.984886 | 364.776 | 417.424 |
| right | 357.500 | 13.326 | 69.153909 | 330.522 | 384.478 |
| autism | positive | left | 355.600 | 15.242 | 64.041434 | 324.744 | 386.456 |
| right | 335.100 | 11.642 | 39.194387 | 311.532 | 358.668 |
| neutral | left | 344.200 | 13.751 | 54.370658 | 316.363 | 372.037 |
| right | 338.300 | 12.754 | 49.881016 | 312.482 | 364.118 |
| negative | left | 347.200 | 13.003 | 43.190642 | 320.876 | 373.524 |
| right | 337.700 | 13.326 | 48.180691 | 310.722 | 364.678 |

| group | emotion | side | Mean | Std. Error | Std. Deviation | 95% Confidence Interval | |
| --- | --- | --- | --- | --- | --- | --- | --- |
| Lower Bound | Upper Bound |
| typical | positive | left | -6.019 | 1.211 | 5.019821 | -8.471 | -3.567 |
| right | -3.295 | .931 | 3.864392 | -5.179 | -1.411 |
| neutral | left | -8.370 | 1.493 | 6.038288 | -11.394 | -5.347 |
| right | -5.603 | 1.262 | 5.721930 | -8.158 | -3.049 |
| negative | left | -6.980 | 1.276 | 5.033451 | -9.563 | -4.397 |
| right | -4.309 | 1.244 | 5.121970 | -6.828 | -1.791 |
| autism | positive | left | .534 | 1.211 | 5.786884 | -1.918 | 2.986 |
| right | 1.045 | .931 | 4.440244 | -.839 | 2.929 |
| neutral | left | -1.318 | 1.493 | 7.262732 | -4.341 | 1.706 |
| right | -1.151 | 1.262 | 5.563692 | -3.705 | 1.404 |
| negative | left | .906 | 1.276 | 6.306836 | -1.677 | 3.489 |
| right | .793 | 1.244 | 5.972266 | -1.725 | 3.312 |

Table S6. The EPN Peak Amplitude on PO3 & PO4 electrodes across all participants

Table S7. The EPN Peak Amplitude on PO7 & PO8 electrodes across all participants

| group | emotion | side | Mean | Std. Error | Std. Deviation | 95% Confidence Interval | |
| --- | --- | --- | --- | --- | --- | --- | --- |
| Lower Bound | Lower Bound |
| typical | positive | left | -7.695 | 1.194 | 4.847914 | -10.112 | -5.279 |
| right | -4.330 | .930 | 4.185916 | -6.213 | -2.447 |
| neutral | left | -10.034 | 1.438 | 5.901981 | -12.944 | -7.124 |
| right | -5.964 | 1.335 | 5.820917 | -8.666 | -3.262 |
| negative | left | -8.391 | 1.288 | 4.980818 | -10.998 | -5.783 |
| right | -4.848 | 1.202 | 5.427615 | -7.282 | -2.414 |
| autism | positive | left | -.847 | 1.194 | 5.787271 | -3.264 | 1.569 |
| right | -.100 | .930 | 4.134114 | -1.983 | 1.783 |
| neutral | left | -2.598 | 1.438 | 6.916130 | -5.509 | .312 |
| right | -2.055 | 1.335 | 6.113452 | -4.757 | .647 |
| negative | left | -.444 | 1.288 | 6.445255 | -3.051 | 2.164 |
| right | -.477 | 1.202 | 5.326359 | -2.911 | 1.957 |

Table S8. The EPN Peak Amplitude on Oz electrode across all participants

| group | emotion | Mean | Std. Error | Std. Deviation | 95% Confidence Interval | |
| --- | --- | --- | --- | --- | --- | --- |
| Lower Bound | Upper Bound |
| typical | positive | -5.850 | .912 | 4.086838 | -7.696 | -4.003 |
| neutral | -7.183 | 1.277 | 5.953023 | -9.768 | -4.597 |
| negative | -5.621 | 1.052 | 3.960747 | -7.751 | -3.492 |
| autism | positive | .257 | .912 | 4.070656 | -1.589 | 2.104 |
| neutral | -1.872 | 1.277 | 5.460112 | -4.458 | .714 |
| negative | .556 | 1.052 | 5.345175 | -1.573 | 2.686 |

Table S9. The EPN Peak Latency on PO7 and PO8 electrodes across all participants

| group | emotion | side | Mean | Std. Error | Std. Deviation | 95% Confidence Interval | |
| --- | --- | --- | --- | --- | --- | --- | --- |
| Lower Bound | Upper Bound |
| typical | positive | left | 224.800 | 9.153 | 36.403586 | 206.270 | 243.330 |
| right | 219.900 | 8.231 | 35.335832 | 203.237 | 236.563 |
| neutral | left | 216.900 | 7.463 | 29.717795 | 201.791 | 232.009 |
| right | 213.700 | 7.122 | 27.470750 | 199.282 | 228.118 |
| negative | left | 223.800 | 8.419 | 32.35266 | 206.757 | 240.843 |
| right | 222.700 | 7.870 | 27.94939 | 206.768 | 238.632 |
| autism | positive | left | 231.300 | 9.153 | 45.013565 | 212.770 | 249.830 |
| right | 226.000 | 8.231 | 38.229226 | 209.337 | 242.663 |
| neutral | left | 228.000 | 7.463 | 36.672089 | 212.891 | 243.109 |
| right | 231.100 | 7.122 | 35.697413 | 216.682 | 245.518 |
| negative | left | 223.100 | 8.419 | 42.28960 | 206.057 | 240.143 |
| right | 208.500 | 7.870 | 41.18699 | 192.568 | 224.432 |

Table S10. The EPN Peak Latency on Oz electrode across all participants

| group | emotion | Mean | Std. Error | Std. Deviation | 95% Confidence Interval | |
| --- | --- | --- | --- | --- | --- | --- |
| Lower Bound | Upper Bound |
| typical | positive | 232.400 | 8.491 | 40.908627 | 215.212 | 249.588 |
| neutral | 222.300 | 7.337 | 32.146212 | 207.446 | 237.154 |
| negative | 231.700 | 8.998 | 38.85885 | 213.484 | 249.916 |
| autism | positive | 247.400 | 8.491 | 34.787172 | 230.212 | 264.588 |
| neutral | 235.400 | 7.337 | 33.467030 | 220.546 | 250.254 |
| negative | 216.900 | 8.998 | 41.57669 | 198.684 | 235.116 |

Table S11. The N400 Mean Amplitude on PO7 and PO8 electrodes across all participants

| group | emotion | side | Mean | Std. Error | Std. Deviation | 95% Confidence Interval | |
| --- | --- | --- | --- | --- | --- | --- | --- |
| Lower Bound | Upper Bound |
| typical | positive | left | 3.020 | 1.315 | 3.783132 | .359 | 5.681 |
| right | 3.973 | 1.146 | 4.243144 | 1.653 | 6.293 |
| neutral | left | 2.856 | 1.111 | 2.987314 | .607 | 5.104 |
| right | 3.432 | 1.082 | 3.723560 | 1.243 | 5.622 |
| negative | left | 3.542 | 1.269 | 3.585996 | .973 | 6.110 |
| right | 4.127 | 1.251 | 3.957290 | 1.595 | 6.658 |
| autism | positive | left | 3.188 | 1.315 | 7.403763 | .527 | 5.849 |
| right | 4.348 | 1.146 | 5.875734 | 2.028 | 6.668 |
| neutral | left | 3.537 | 1.111 | 6.357464 | 1.289 | 5.786 |
| right | 3.454 | 1.082 | 5.739380 | 1.264 | 5.644 |
| negative | left | 4.289 | 1.269 | 7.178289 | 1.721 | 6.858 |
| right | 4.987 | 1.251 | 6.847775 | 2.456 | 7.519 |

Table S12. The N400 Mean Amplitude on P7 and P8 electrodes across all participants

| group | emotion | side | Mean | Std. Error | Std. Deviation | 95% Confidence Interval | |
| --- | --- | --- | --- | --- | --- | --- | --- |
| Lower Bound | Upper Bound |
| typical | Positive | left | 2.682 | 1.327 | 3.517619 | -.005 | 5.369 |
| right | 4.385 | .958 | 3.485932 | 2.444 | 6.325 |
| neutral | left | 2.098 | 1.040 | 2.603735 | -.007 | 4.203 |
| right | 3.632 | .856 | 2.908715 | 1.898 | 5.365 |
| Negative | left | 2.856 | 1.220 | 3.874693 | .386 | 5.326 |
| right | 4.442 | 1.075 | 3.378227 | 2.266 | 6.618 |
| autism | Positive | left | 2.261 | 1.327 | 7.622844 | -.426 | 4.948 |
| right | 3.719 | .958 | 4.958129 | 1.778 | 5.659 |
| neutral | left | 2.512 | 1.040 | 6.039057 | .407 | 4.617 |
| right | 2.802 | .856 | 4.567729 | 1.069 | 4.535 |
| Negative | left | 3.040 | 1.220 | 6.673379 | .570 | 5.510 |
| right | 4.072 | 1.075 | 5.898924 | 1.896 | 6.248 |
